# Supplementary material for: Solid state synthesis of nano-sized AlH3 and its dehydriding behaviour
Source: Royal Society of Chemistry journal article supplement (doi:10.1039/c5gc00426h), 2015-01-01
Supplement: c5gc00426h1.pdf [file c5gc00426h1.pdf]

## Supporting information

### Solid state synthesis of nano-sized $\text{AlH}_3$ and its dehydriding behaviour

Duan Congwen, Hu Lianxi,\* and Xue Dan

School of Materials Science and Engineering, Harbin Institute of Technology, Harbin, 150001, China

E-mail: 12B909049@hit.edu.cn

**Figure S1. Proposed reagent of the  $\text{LiH}$ ,  $\text{CaH}_2$ ,  $\text{MgH}_2$  and  $\text{AlCl}_3$  phase as identified by XRD**

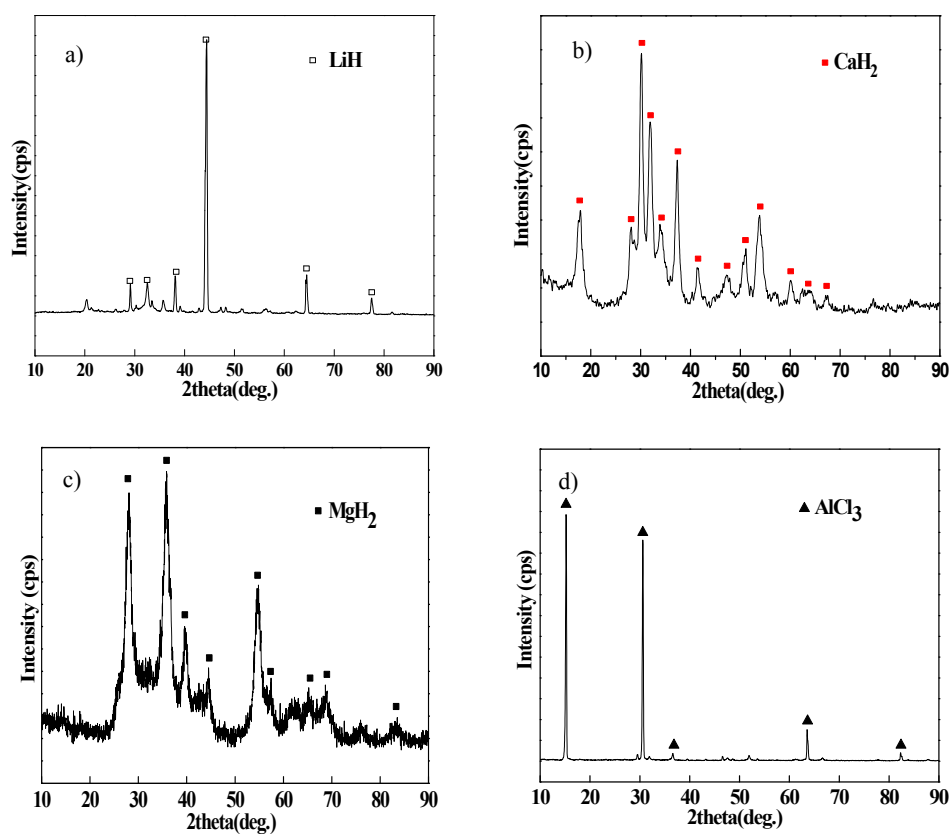

Fig. S1 XRD patterns of a)  $\text{LiH}$  phase, b)  $\text{CaH}_2$  phase, c)  $\text{Mg}$  powders milled in hydrogen for 20h, d)  $\text{AlCl}_3$  phase,

It is suggested from Fig. S1c that the solid-gas reaction was completed until milling in hydrogen for 20 h. Subsequently, the  $\text{MgH}_2$  phase was fully formed. Calculated by Scherrer equation based on the XRD patterns, the average crystallite size of  $\text{MgH}_2$

phase can reach 10 nm.

**Figure S2. Proposed reagent of the  $\text{MgH}_2$  and  $\text{AlCl}_3$  phase as identified by SEM**

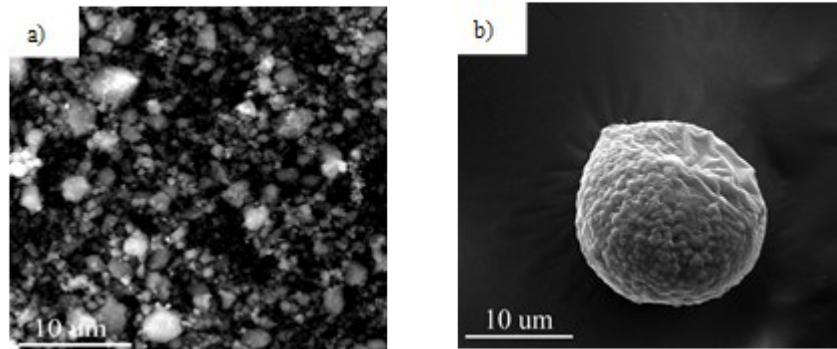

Fig. S2 SEM morphology of a)  $\text{MgH}_2$  phase, b)  $\text{AlCl}_3$  phase..

Upon milling for 20h, it can be seen from the Fig. 2a that most individual particles of  $\text{MgH}_2$  were between 1 and 2  $\mu\text{m}$  in size.

**Figure S3. The isothermal desorption curves of the  $\text{MgH}_2/\text{AlCl}_3$  powders**

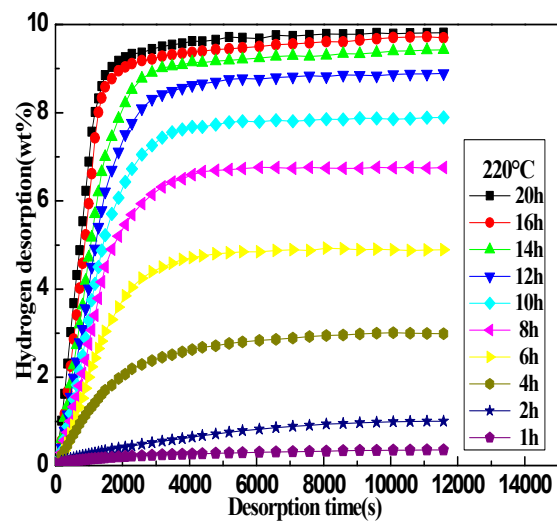

Fig. S3 Isothermal desorption curves of the  $\text{MgH}_2/\text{AlCl}_3$  powders milled at 400 rpm with a ball to powder mass ratio (BPR) of 60:1 for different times.
